# Supplementary material
Source: ML conference proceedings conference paper supplement (https://openaccess.thecvf.com/content/WACV2024/html/Reddy_Towards_Domain-Aware_Knowledge_WACV_2024_paper.html)
Supplement: Supplementary file 1 [file Reddy_Towards_Domain-Aware_Knowledge_WACV_2024_supplemental.pdf]

# Towards Domain-Aware Knowledge Distillation for Continual Model Generalization - Supplementary material

Nikhil Reddy<sup>1</sup> Mahsa Baktashmotlagh<sup>2</sup>  
Chetan Arora<sup>3</sup>

<sup>1</sup>UQ-IIT Delhi Research Academy (UQIDAR) <sup>2</sup>UQ, Australia <sup>3</sup>IIT Delhi, India  
<https://dose-iitd.github.io/>

## 1. Comparison with Existing TTA methods

| Method                    | Inference time |
|---------------------------|----------------|
| IBNNet [10]               | 73             |
| <b>DoSe (ours)</b>        | 872            |
| w/o Self-Distillation     | 324            |
| w/o Exemplar-based Buffer | 548            |

Table 1. Inference time comparison of DoSe framework on IBN-Net [10] with different loss variants, Inference time values are in seconds.

We compare the existing SOTA Test-time Adaptation methods on the RefineNet [5] pre-trained model trained on the source (daytime) dataset. Results are reported in Tab. 4. We compare our proposed DoSe with existing TTA Adaptation methods TENT [16], EATA [8], MEMO [19], SAR [9], NOTE [3], RoTTA [18], MECTA [4], RATP [6], RMT [2], MALL [12], ONDA [11], and CoTTA [17]. We consider four adverse weather conditions such as fog, rain, night and snow. We consider 10 iterations on ACDC-val [13] dataset. Our DoSe outperforms existing TTA methods and improves the performance of RefineNet [5] by 5.5% better mIoU in the task of continual test-time adaptation.

## 2. Ablation study

### 2.1. Computational cost on C-Driving dataset

We analyze the computational cost of the proposed DoSe framework, we consider the RefineNet [5] model and adapt it to 100-overcast images from C-Driving [7] and perform continual test-time adaptation for 10 iterations. Results are reported in Tab. 3. Proposed DoSe framework adapts to continually changing target environment faster than existing SOTA method CoTTA [17].

| Method                   | Inference time |
|--------------------------|----------------|
| DeepLabv3+ ResNet101 [1] | 110            |
| CoTTA [17]               | 1080           |
| <b>DoSe (ours)</b>       | 910            |

Table 2. Inference time comparison of DoSe framework on RefineNet [5] on C-Driving dataset, Inference time values are in seconds.

| Method                       | Inference time |
|------------------------------|----------------|
| DeepLabv3+ mobilenet V2 [14] | 40             |
| CoTTA [17]                   | 350            |
| <b>DoSe (ours)</b>           | 220            |

Table 3. Inference time comparison of DoSe framework on DeepLabv3+ Mobilenet V2 [14] on SHIFT dataset, Inference time values are in seconds.

### 2.2. Computational cost on SHIFT dataset

We analyze the computational cost of the proposed DoSe framework, we consider the DeepLabv3+ mobilenet V2 [14] model and adapt it to 100-Fog images from SHIFT dataset [15] and perform continual test-time adaptation for 10 iterations. Results are reported in Tab. 3. Proposed DoSe framework adapts to continually changing target environment faster than existing SOTA method CoTTA [17].

### 2.3. Computational cost - Loss function

We analyze the computational cost of the proposed DoSe framework, with different individual components of the total loss function. We consider SOTA DG method IBN-Net [10] as our base pre-trained model. We took 100 images from ACDC-snow [13] and apply the total loss function with and without loss components. Results are reported in Tab. 1.

| Time                  | $t \longrightarrow$ |             |             |             |             |             |             |             |             |             |             |             |             |             |             |             |             |
|-----------------------|---------------------|-------------|-------------|-------------|-------------|-------------|-------------|-------------|-------------|-------------|-------------|-------------|-------------|-------------|-------------|-------------|-------------|
| Round                 | 1                   |             |             |             | 4           |             |             |             | 7           |             |             |             | 10          |             |             |             | All         |
| Model+Method          | Fog                 | Night       | rain        | snow        | Fog         | Night       | rain        | snow        | Fog         | Night       | rain        | snow        | Fog         | Night       | rain        | snow        | Mean        |
| RefineNet [5]         | 55.9                | 42.6        | 44.2        | 21.5        | 55.9        | 42.6        | 44.2        | 21.5        | 55.9        | 42.6        | 44.2        | 21.5        | 55.9        | 42.6        | 44.2        | 21.5        | 41.1        |
| • BN Stats Adapt      | 54.2                | 41.1        | 43.9        | 20.4        | 53.7        | 40.7        | 43.7        | 20.2        | 53.6        | 40.1        | 43.6        | 20.1        | 53.4        | 39.8        | 43.5        | 19.9        | 39.5        |
| • TENT-continual [16] | 57.5                | 43.1        | 45.8        | 22.8        | 53.8        | 42.7        | 42.9        | 21.3        | 51.4        | 41.2        | 42.6        | 21.1        | 50.7        | 40.4        | 41.4        | 20.7        | 40.1        |
| • EATA-continual [8]  | 57.8                | 44.9        | 46.4        | 21.7        | 53.1        | 44.8        | 43.7        | 22.5        | 52.7        | 42.3        | 43.8        | 22.4        | 51.1        | 41.8        | 42.4        | 22.8        | 40.8        |
| • MEMO [19]           | 59.7                | 45.2        | 45.8        | 22.7        | 54.8        | 45.7        | 44.8        | 23.7        | 53.9        | 44.8        | 45.6        | 23.9        | 52.7        | 42.7        | 43.4        | 34.8        | 42.5        |
| • SAR [9]             | 54.6                | 43.8        | 43.7        | 26.8        | 55.9        | 45.6        | 46.3        | 24.9        | 55.8        | 46.5        | 46.1        | 24.5        | 53.9        | 44.7        | 45.6        | 35.5        | 42.3        |
| • NOTE [3]            | 52.1                | 39.7        | 40.1        | 27.8        | 56.7        | 45.3        | 46.8        | 22.1        | 55.1        | 44.5        | 44.4        | 24.5        | 53.7        | 42.8        | 44.3        | 34.1        | 42.1        |
| • RoTTA [18]          | 50.8                | 38.9        | 40.3        | 25.9        | 55.1        | 45.2        | 45.4        | 21.9        | 54.8        | 44.2        | 44.5        | 24.1        | 50.9        | 43.1        | 44.5        | 34.7        | 41.5        |
| • MECTA [4]           | 50.6                | 37.7        | 41.1        | 26.4        | 54.5        | 44.8        | 46.2        | 20.3        | 53.7        | 44.8        | 44.7        | 23.7        | 50.6        | 42.8        | 43.6        | 32.8        | 41.1        |
| • RATP [6]            | 51.1                | 38.3        | 40.9        | 25.9        | 53.9        | 43.7        | 45.9        | 21.1        | 52.7        | 43.6        | 44.4        | 22.9        | 51.9        | 43.2        | 44.2        | 33.4        | 41.3        |
| • RMT [2]             | 52.4                | 38.9        | 40.6        | 25.1        | 52.7        | 44.8        | 45.7        | 22.5        | 52.6        | 44.5        | 45.3        | 23.4        | 52.9        | 42.2        | 43.1        | 34.5        | 41.4        |
| • MALL [12]           | 53.5                | 39.1        | 45.1        | 26.5        | 51.1        | 42.8        | 43.8        | 24.2        | 54.3        | 44.8        | 47.8        | 23.9        | 53.7        | 44.2        | 43.1        | 36.2        | 42.2        |
| • ONDA [11]           | 53.1                | 39.9        | 45.4        | 26.1        | 51.4        | 42.1        | 43.1        | 24.8        | 55.1        | 44.2        | 47.1        | 23.2        | 54.2        | 45.1        | 44.2        | 34.8        | 42.5        |
| • CoTTA [17]          | 55.2                | 39.4        | 45.8        | 28.9        | 54.3        | 43.2        | 44.2        | 24.7        | 56.6        | 45.5        | 47.5        | 24.3        | 55.3        | 46.7        | 46.2        | 37.1        | 43.6        |
| • DoSe (ours)         | <b>57.4</b>         | <b>41.6</b> | <b>46.4</b> | <b>30.2</b> | <b>55.9</b> | <b>45.8</b> | <b>48.8</b> | <b>26.1</b> | <b>58.8</b> | <b>45.9</b> | <b>48.8</b> | <b>25.6</b> | <b>57.8</b> | <b>49.1</b> | <b>47.1</b> | <b>37.3</b> | <b>46.5</b> |

Table 4. Comparison of DoSe with existing TTA methods on pre-trained daytime model RefineNet [5]. The experiment setup is described in the paper.

| Time                     | $t \longrightarrow$ |             |             |             |             |             |             |             |             |             |             |             |             |             |             |             |             |
|--------------------------|---------------------|-------------|-------------|-------------|-------------|-------------|-------------|-------------|-------------|-------------|-------------|-------------|-------------|-------------|-------------|-------------|-------------|
| Round                    | 1                   |             |             |             | 4           |             |             |             | 7           |             |             |             | 10          |             |             |             | All         |
| Model+Method             | snow                | rain        | fog         | night       | snow        | rain        | fog         | night       | snow        | rain        | fog         | night       | snow        | rain        | fog         | night       | Mean        |
| DeepLabv3+ ResNet101 [1] | 50.6                | 52.3        | 67.6        | 21.9        | 50.6        | 52.3        | 67.6        | 21.9        | 50.6        | 52.3        | 67.6        | 21.9        | 50.6        | 52.3        | 67.6        | 21.9        | 48.1        |
| • DoSe (ours)            | <b>51.4</b>         | <b>53.8</b> | <b>68.9</b> | <b>22.3</b> | <b>53.8</b> | <b>54.3</b> | <b>69.6</b> | <b>23.8</b> | <b>55.7</b> | <b>55.6</b> | <b>71.8</b> | <b>25.2</b> | <b>57.9</b> | <b>56.8</b> | <b>73.4</b> | <b>27.9</b> | <b>51.4</b> |

Table 5. Ablation study of Proposed framework DoSe using DeepLabv3+ ResNet101 [1] on ACDC [13] dataset with change in order of sequence. The experiment setup is described in the paper.

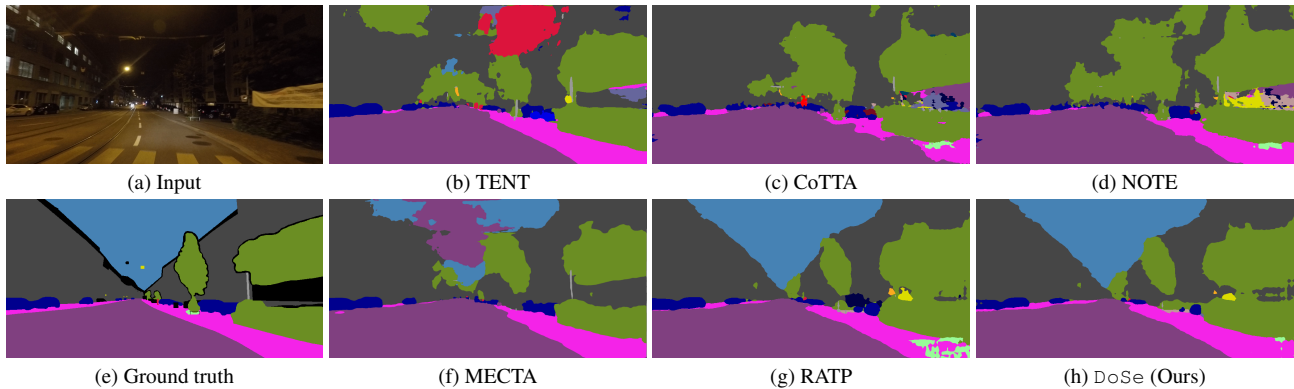

Figure 1. Comparison of our approach, DoSe, with existing SOTA Test-Time Adaptation methods.

### 3. Qualitative Results

In Fig. 1, we demonstrate the qualitative visual results of the DoSe and compare the visual results with existing SOTA Test-time Adaptation methods. Results demonstrate that DoSe can identify minority classes, such as traffic lights etc., effectively.

### References

- [1] Liang-Chieh Chen, Yukun Zhu, George Papandreou, Florian Schroff, and Hartwig Adam. Encoder-decoder with atrous separable convolution for semantic image segmentation. In *Proceedings of the European Conference on Computer Vision (ECCV)*, September 2018. 1, 2
- [2] Mario Döbler, Robert A Marsden, and Bin Yang. Robust mean teacher for continual and gradual test-time adaptation.

- In *Proceedings of the IEEE/CVF Conference on Computer Vision and Pattern Recognition*, pages 7704–7714, 2023. 1, 2
- [3] Taesik Gong, Jongheon Jeong, Taewon Kim, Yewon Kim, Jinwoo Shin, and Sung-Ju Lee. NOTE: Robust continual test-time adaptation against temporal correlation. In *Advances in Neural Information Processing Systems (NeurIPS)*, 2022. 1, 2
- [4] Junyuan Hong, Lingjuan Lyu, Jiayu Zhou, and Michael Spranger. Mecta: Memory-economic continual test-time model adaptation. In *The Eleventh International Conference on Learning Representations*, 2023. 1, 2
- [5] Guosheng Lin, Anton Milan, Chunhua Shen, and Ian Reid. Refinenet: Multi-path refinement networks for high-resolution semantic segmentation. In *Proceedings of the IEEE conference on computer vision and pattern recognition*, pages 1925–1934, 2017. 1, 2
- [6] Chenxi Liu, Lixu Wang, Lingjuan Lyu, Chen Sun, Xiao Wang, and Qi Zhu. Deja vu: Continual model generalization for unseen domains. *arXiv preprint arXiv:2301.10418*, 2023. 1, 2
- [7] Ziwei Liu, Zhongqi Miao, Xingang Pan, Xiaohang Zhan, Dahua Lin, Stella X. Yu, and Boqing Gong. Open compound domain adaptation. In *IEEE Conference on Computer Vision and Pattern Recognition (CVPR)*, 2020. 1
- [8] Shuaicheng Niu, Jiaxiang Wu, Yifan Zhang, Yafo Chen, Shijian Zheng, Peilin Zhao, and Mingkui Tan. Efficient test-time model adaptation without forgetting. In *The International Conference on Machine Learning*, 2022. 1, 2
- [9] Shuaicheng Niu, Jiaxiang Wu, Yifan Zhang, Zhiquan Wen, Yafo Chen, Peilin Zhao, and Mingkui Tan. Towards stable test-time adaptation in dynamic wild world. In *International Conference on Learning Representations*, 2023. 1, 2
- [10] Xingang Pan, Ping Luo, Jianping Shi, and Xiaoou Tang. Two at once: Enhancing learning and generalization capacities via ibn-net. In *Proceedings of the European Conference on Computer Vision (ECCV)*, pages 464–479, 2018. 1
- [11] Theodoros Panagiotakopoulos, Pier Luigi Dovesi, Linus Härenstam-Nielsen, and Matteo Poggi. Online domain adaptation for semantic segmentation in ever-changing conditions. In *European Conference on Computer Vision (ECCV)*, 2022. 1, 2
- [12] Nikhil Reddy, Abhinav Singhal, Abhishek Kumar, Mahsa Baktashmotlagh, and Chetan Arora. Master of all: Simultaneous generalization of urban-scene segmentation to all adverse weather conditions. In *Computer Vision—ECCV 2022: 17th European Conference, Tel Aviv, Israel, October 23–27, 2022, Proceedings, Part XXXIX*, pages 51–69. Springer, 2022. 1, 2
- [13] Christos Sakaridis, Dengxin Dai, and Luc Van Gool. Acdc: The adverse conditions dataset with correspondences for semantic driving scene understanding. *arXiv preprint arXiv:2104.13395*, 2021. 1, 2
- [14] Mark Sandler, Andrew Howard, Menglong Zhu, Andrey Zhmoginov, and Liang-Chieh Chen. Mobilenetv2: Inverted residuals and linear bottlenecks. In *Proceedings of the IEEE conference on computer vision and pattern recognition*, pages 4510–4520, 2018. 1
- [15] Tao Sun, Mattia Segu, Janis Postels, Yuxuan Wang, Luc Van Gool, Bernt Schiele, Federico Tombari, and Fisher Yu. Shift: a synthetic driving dataset for continuous multi-task domain adaptation. In *Proceedings of the IEEE/CVF Conference on Computer Vision and Pattern Recognition*, pages 21371–21382, 2022. 1
- [16] Dequan Wang, Evan Shelhamer, Shaoteng Liu, Bruno Olshausen, and Trevor Darrell. Tent: Fully test-time adaptation by entropy minimization. *arXiv preprint arXiv:2006.10726*, 2020. 1, 2
- [17] Qin Wang, Olga Fink, Luc Van Gool, and Dengxin Dai. Continual test-time domain adaptation. In *Proceedings of the IEEE/CVF Conference on Computer Vision and Pattern Recognition*, pages 7201–7211, 2022. 1, 2
- [18] Longhui Yuan, Binhui Xie, and Shuang Li. Robust test-time adaptation in dynamic scenarios. In *Proceedings of the IEEE/CVF Conference on Computer Vision and Pattern Recognition*, pages 15922–15932, 2023. 1, 2
- [19] M. Zhang, S. Levine, and C. Finn. MEMO: Test time robustness via adaptation and augmentation. 2021. 1, 2
